# Supplementary material
Source: HighWire-hosted journal article supplement (https://www.cmajopen.ca/highwire/filestream/81035/field_highwire_adjunct_files/1/open-2016-0039-original-submission.pdf)
Supplement: open-2016-0039-original-submission.pdf [file open-2016-0039-original-submission.pdf]

## Cancer Incidence Attributable to Excess Body Weight in Alberta, Canada in 2012

|                               |                                                                                                                                                                                                                                                                                                                                                                                                                                                                                                                                                                                                                                                                                                                                                                                                                                                                                                                                                                                                                                                                                                                                                                                                                                                                                                                                                                                                                                                                                                                                                                                                                                                                          |
|-------------------------------|--------------------------------------------------------------------------------------------------------------------------------------------------------------------------------------------------------------------------------------------------------------------------------------------------------------------------------------------------------------------------------------------------------------------------------------------------------------------------------------------------------------------------------------------------------------------------------------------------------------------------------------------------------------------------------------------------------------------------------------------------------------------------------------------------------------------------------------------------------------------------------------------------------------------------------------------------------------------------------------------------------------------------------------------------------------------------------------------------------------------------------------------------------------------------------------------------------------------------------------------------------------------------------------------------------------------------------------------------------------------------------------------------------------------------------------------------------------------------------------------------------------------------------------------------------------------------------------------------------------------------------------------------------------------------|
| Journal:                      | <i>CMAJ Open</i>                                                                                                                                                                                                                                                                                                                                                                                                                                                                                                                                                                                                                                                                                                                                                                                                                                                                                                                                                                                                                                                                                                                                                                                                                                                                                                                                                                                                                                                                                                                                                                                                                                                         |
| Manuscript ID                 | CMAJOpen-2016-0039                                                                                                                                                                                                                                                                                                                                                                                                                                                                                                                                                                                                                                                                                                                                                                                                                                                                                                                                                                                                                                                                                                                                                                                                                                                                                                                                                                                                                                                                                                                                                                                                                                                       |
| Manuscript Type:              | Other                                                                                                                                                                                                                                                                                                                                                                                                                                                                                                                                                                                                                                                                                                                                                                                                                                                                                                                                                                                                                                                                                                                                                                                                                                                                                                                                                                                                                                                                                                                                                                                                                                                                    |
| Date Submitted by the Author: | 22-Mar-2016                                                                                                                                                                                                                                                                                                                                                                                                                                                                                                                                                                                                                                                                                                                                                                                                                                                                                                                                                                                                                                                                                                                                                                                                                                                                                                                                                                                                                                                                                                                                                                                                                                                              |
| Complete List of Authors:     | Brenner, Darren; Alberta health Services, Cancer Epidemiology and Prevention Research; University of Calgary, Oncology; University of Calgary, Community Health Sciences<br>Grundy, Anne; Alberta Health Services, Cancer Epidemiology and Prevention Research<br>Poirier, Abbey; Alberta Health Services, Cancer Epidemiology and Prevention Research<br>Khandwala, Farah; Alberta Health Services, Cancer Epidemiology and Prevention Research<br>McFadden, Alison; Alberta Health Services, Cancer Epidemiology and Prevention Research<br>Friedenreich, CM; Alberta Health Services, Cancer Epidemiology and Prevention Research; University of Calgary, Oncology; University of Calgary, Community Health Sciences                                                                                                                                                                                                                                                                                                                                                                                                                                                                                                                                                                                                                                                                                                                                                                                                                                                                                                                                                  |
| Keywords:                     | Epidemiology, Oncology, Obesity                                                                                                                                                                                                                                                                                                                                                                                                                                                                                                                                                                                                                                                                                                                                                                                                                                                                                                                                                                                                                                                                                                                                                                                                                                                                                                                                                                                                                                                                                                                                                                                                                                          |
| More Detailed Keywords:       | Cancer, Population attributable risk, Overweight                                                                                                                                                                                                                                                                                                                                                                                                                                                                                                                                                                                                                                                                                                                                                                                                                                                                                                                                                                                                                                                                                                                                                                                                                                                                                                                                                                                                                                                                                                                                                                                                                         |
| Abstract:                     | <p>Background: Excess body weight has been consistently associated with colorectal, breast, endometrial, esophageal, gallbladder, pancreatic and kidney cancers. The objective of this analysis was to estimate the proportion of total and site-specific cancers attributable to excess body weight in Alberta in 2012.</p> <p>Methods: We estimated the proportions of attributable cancers using population attributable risk. Risk estimates were obtained from recent meta-analyses and exposure prevalence estimates were obtained from the Canadian Community Health Survey. Individuals with a body mass index (kg/m<sup>2</sup>) of &gt;25-&lt;30 and ≥30 were categorized as overweight and obese, respectively.</p> <p>Results: Approximately 48 – 64% of men and 27 – 55% of women in Alberta were classified as either overweight or obese, where these proportions increased with age in both sexes. We estimate that approximately 17% and 11% of obesity-related cancers among men and women, respectively, could be attributed to excess body weight in Alberta in 2012. The heaviest absolute burden in terms of number of cases is seen for breast cancer among women and for colorectal cancer among men. Overall, approximately 5% of all cancers in Alberta in 2012 were attributable to excess body weight among adult Albertans in 2000-2003.</p> <p>Interpretation: Excess body weight contributes to a substantial proportion of cases of cancers associated with overweight and obesity annually in Alberta. Strategies to improve energy imbalance and reduce the proportion of obese and overweight Canadians may have a notable impact</p> |

1  
2  
3  
4  
5  
6  
7  
8  
9  
10  
11  
12  
13  
14  
15  
16  
17  
18  
19  
20  
21  
22  
23  
24  
25  
26  
27  
28  
29  
30  
31  
32  
33  
34  
35  
36  
37  
38  
39  
40  
41  
42  
43  
44  
45  
46  
47  
48  
49  
50  
51  
52  
53  
54  
55  
56  
57  
58  
59  
60

|  |                                    |
|--|------------------------------------|
|  | on cancer incidence in the future. |
|  |                                    |

SCHOLARONE™  
Manuscripts

Confidential

## Cancer Incidence Attributable to Excess Body Weight in Alberta, Canada in 2012

Darren R. Brenner PhD<sup>1,2,3,\*</sup>, Anne Grundy PhD<sup>1</sup>, Abbey E. Poirier MSc<sup>1</sup>, Farah Khandwala MSc<sup>1</sup>, Alison McFadden BSc<sup>1</sup>, Christine M. Friedenreich PhD<sup>1,2,3</sup>

1. Department of Cancer Epidemiology and Prevention Research, CancerControl Alberta, Alberta Health Services
2. Department of Oncology, Cumming School of Medicine, University of Calgary
3. Department of Community Health Sciences, Cumming School of Medicine, University of Calgary

\*To Whom Correspondence should be addressed.

Department of Cancer Epidemiology and Prevention Research  
CancerControl Alberta, Alberta Health Services  
Holy Cross Centre - Room 513C  
Box ACB, 2210-2nd St. SW.  
Calgary, AB.  
T2S 3C3  
[Darren.Brenner@albertahealthservices.ca](mailto:Darren.Brenner@albertahealthservices.ca)

**Running Title:** Cancer Incidence Attributable to Excess Body Weight in Alberta

**ABSTRACT**

**Background:** Excess body weight has been consistently associated with colorectal, breast, endometrial, esophageal, gallbladder, pancreatic and kidney cancers. The objective of this analysis was to estimate the proportion of total and site-specific cancers attributable to excess body weight in Alberta in 2012.

**Methods:** We estimated the proportions of attributable cancers using population attributable risk. Risk estimates were obtained from recent meta-analyses and exposure prevalence estimates were obtained from the Canadian Community Health Survey. Individuals with a body mass index (kg/m<sup>2</sup>) of >25-<30 and ≥30 were categorized as overweight and obese, respectively.

**Results:** Approximately 48 – 64% of men and 27 – 55% of women in Alberta were classified as either overweight or obese, where these proportions increased with age in both sexes. We estimate that approximately 17% and 11% of obesity-related cancers among men and women, respectively, could be attributed to excess body weight in Alberta in 2012. The heaviest absolute burden in terms of number of cases is seen for breast cancer among women and for colorectal cancer among men. Overall, approximately 5% of all cancers in Alberta in 2012 were attributable to excess body weight among adult Albertans in 2000-2003.

**Interpretation:** Excess body weight contributes to a substantial proportion of cases of cancers associated with overweight and obesity annually in Alberta. Strategies to improve energy imbalance and reduce the proportion of obese and overweight Canadians may have a notable impact on cancer incidence in the future.

## INTRODUCTION

This manuscript is the third in a series of exposure-specific manuscripts concerning the proportion of cancer attributable to modifiable lifestyle and environmental risk factors in the general population of Alberta. The methodologic framework for this series methods has been previously described.[1]

In 2002, the International Agency for Research on Cancer Handbook on Weight Control and Physical Activity concluded that overweight and obesity are related to cancers of the colon, endometrium, kidney and esophagus (adenocarcinomas), as well as postmenopausal breast cancer.[2] In 2007, a report by the World Cancer Research Fund Panel on Food, Nutrition, Physical Activity and the Prevention of Cancer concluded that there was also convincing evidence for associations between overweight and obesity and cancers of the pancreas and ovary, as well as a probable association with cancers of the gall bladder.[3] The most commonly suggested candidates for the mechanistic pathways linking obesity to cancer risk are : Insulin resistance and insulin-like growth factors, altered levels of sex steroids, altered levels of leptin and adiponectin, obesity-related inflammatory cytokines, altered immune functions and oxidative stress.[4]

Substantial research has evaluated the association between excess body weight and cancer risk at various sites. In the United Kingdom, Parkin and Boyd (2011) estimated that 5.5% of all incident cancers in 2010 were attributable to excess body weight.[5] Based on these efforts, it was determined that those sites with the most consistent associations were: breast (postmenopausal), colon, esophageal (adenocarcinoma), kidney, endometrium, gall bladder and pancreas.[5]

1  
2  
3 We previously estimated that 2.6% and 4.6% of cancers among men and women,  
4  
5 respectively in Canada could be attributed to excess body weight (body mass index >25).[6] We  
6  
7 did not, however, estimate the number or proportion of cancer cases attributable to excess body  
8  
9 weight at the provincial level and expect the potential for substantial variation across provinces  
10  
11 because of cross-provincial differences in prevalence of excess body weight. The purpose of this  
12  
13 analysis was to estimate the proportion of incident cancers that occurred in Alberta, Canada in  
14  
15 2012 attributable to overweight and obesity. We included the seven cancer sites previously  
16  
17 shown to be positively associated with overweight/obesity (as described above) in our population  
18  
19 attributable risk estimations for comparability of methods and results.  
20  
21  
22  
23  
24  
25  
26

## 27 **METHODS**

### 28 *Latency Period*

29  
30  
31 The effect of obesity on cancer risk is understood to be the result of past exposure.  
32  
33 Therefore, a biologically meaningful latency period of 10-12 years between exposure and  
34  
35 subsequent cancer was identified from previous prospective cohort studies (Table 1). As has  
36  
37 been previously described [1], we considered the theoretical latency period to be the time  
38  
39 between initiation of exposure and cancer diagnosis and the measured latency period to be the  
40  
41 time between exposure measurement and cancer diagnosis. A 10-12 year latency period was  
42  
43 estimated by applying the estimates of exposure prevalence in 2000-2003 to cases occurring in  
44  
45 2012 and assuming that those exposed in 2000-2003 would have transitioned into the subsequent  
46  
47 10-year cancer incidence group by the time of diagnosis. Data from the Canadian Community  
48  
49 Health Survey were obtained to estimate the prevalence of overweight and obese adults in  
50  
51 Alberta. The cycle of the Canadian Community Health Survey used corresponded to the  
52  
53  
54  
55  
56  
57  
58  
59  
60

midpoint of the latency period suggested by prospective cohort studies for each cancer site of interest (Supplementary Table 1).

### *Prevalence of Exposure*

Body mass index ( $\text{kg}/\text{m}^2$ ) was estimated for the Alberta population aged 18 and over, excluding pregnant females and persons less than 3 feet (0.914 meters) tall or greater than 6 feet 11 inches (2.108 meters) from the Canadian Community Health Survey. Cut-points were used according to Health Canada classifications for body weight [7]: less than 18.50 (underweight); 18.50 to 24.99 (normal weight); 25.00 to 29.99 (overweight); 30.00 to 34.99 (obese, class I); 35.00 to 39.99 (obese, class II); 40.00 or greater (obese, class III). Descriptions of the survey methods used to generate the sampling strategy for the Canadian Community Health Survey have been published previously.[8] The proportions of overweight and obese Albertans are shown in Table 2.

### *Risk Estimates*

Risk estimates used for estimating population attributable risks were taken from the comprehensive meta-analysis of excess body weight and cancer risk by Renehan et al. 2008 [9] (Table 1). Estimates of RR for an increase in body mass index of  $5 \text{ kg}/\text{m}^2$  were used for the overweight group and, assuming a constant rate of increase in risk, the square of this value was used for the obese category.

### *Population Attributable Risk Estimation*

To estimate the number of attributable of cases in Alberta associated with excess body weight, we used the following formula for the population attributable risk:

$$\text{Population attributable risk} = \frac{(p_1 \times ERR_1) + (p_2 \times ERR_2)}{1 + [(p_1 \times ERR_1) + (p_2 \times ERR_2)]}$$

The population attributable risk was estimated for the different sex and age groups using

1  
2  
3 the prevalence estimates of overweight/obesity according to the formula where  $p_1$  is the  
4  
5 proportion of the population that is overweight,  $p_2$  the proportion of the population that is obese,  
6  
7  
8  $ERR_1$  the excess relative risk ( $RR-1$ ) for overweight and  $ERR_2$  the excess relative risk ( $RR-1$ )  
9  
10 for obesity.  
11

12 To estimate 95% confidence intervals around population attributable risk estimates,  
13  
14 Monte Carlo simulation methods were used wherein the relative risk estimates were drawn from  
15  
16 a log normal distribution, prevalence estimates were drawn from a binomial distribution, and  
17  
18 incidence estimates were drawn from a Poisson distribution. Parameters for the distributions  
19  
20 were defined by reported point estimates and confidence intervals. 10,000 samples were drawn  
21  
22 and the 2.5th and 97.5th percentiles of the resulting population attributable risk distribution  
23  
24 used as the lower and upper limits of a 95 % confidence interval. Similar techniques were used  
25  
26 by two previous studies that estimated population attributable risk.[10, 11] Wherever possible  
27  
28 and appropriate, these estimations were performed for individual sex and age groups.  
29  
30  
31  
32  
33  
34  
35

### 36 *Cancer Incidence Data*

37  
38 To determine the number of cancer cases attributable to excess body weight in Alberta,  
39  
40 age-sex-site-specific cancer incidence strata for 2012 were obtained from the Alberta Cancer  
41  
42 Registry. Age and sex incidence strata were created to match the strata available for the risk  
43  
44 factor prevalence data. The year with the most up-to-date complete data (2012) for all cancer  
45  
46 sites available was used.  
47  
48  
49

50 Of the esophageal cancers, only the number of adenocarcinomas diagnosed in 2012 were  
51  
52 included in our attributable case estimates, since only adenocarcinomas are consistently  
53  
54 associated with overweight/obesity. In this population, 67% and 41% of esophageal cancers  
55  
56  
57  
58  
59  
60



1  
2  
3 were adenocarcinomas in men and women, respectively. We used this approach since  
4 information on histology by cancer site was not available for these analyses. Only post-  
5 menopausal breast cancers were included in attributable estimates by including those breast  
6 cancers occurring after 55 years of age as the median age at menopause among North American  
7 women is 50-52. [12, 13]  
8  
9

### 10 11 12 13 14 *Sensitivity Analysis*

15  
16  
17 As data on overweight and obesity were derived from self-reported measures of body  
18 mass index in the Canadian Community Health Survey, self-report bias had to be considered. To  
19 adjust the Canadian Community Health Survey self-reported prevalence of overweight/obesity, a  
20 sensitivity analysis was conducted. Shields et al. (2011) [14] reported that overweight prevalence  
21 was underestimated by 1.9% among males and 3.9% among females and obesity was  
22 underestimated by 6.4% among males and 6.7% among females in the 2008 Canadian Health  
23 Measures Survey when applied to the 2005 Canadian Community Health Survey estimates.  
24 These correction factors were applied to the Canadian Community Health Survey estimates for  
25 the 2000-2001 cycle to adjust for potential bias (Supplementary Table 1).  
26  
27  
28  
29  
30  
31  
32  
33  
34  
35  
36  
37

## 38 **RESULTS**

### 39 *Prevalence of excess body weight*

40  
41  
42 The prevalence of overweight and obesity in the Alberta adult population for 2000-2001  
43 is presented in Table 3. In general, both overweight and obesity levels were higher among older  
44 age groups, with the highest prevalence observed in the 65-74 year age group. In this age group,  
45 the total population prevalence of overweight was 41.1% (95% confidence interval (CI) = 37.3,  
46 44.9) and obesity was 18.7% (95% CI = 15.9, 21.5). When examining the combined prevalence  
47 of overweight and obesity (data not shown), adult Albertan men had the highest prevalence of  
48  
49  
50  
51  
52  
53  
54  
55  
56  
57  
58  
59  
60

1  
2  
3 excess body weight. For men, >60% of all age groups >35 years reported a body mass index  
4  
5 >25.  
6  
7

#### 8 *Cancer site-specific population attributable risk results*

9

10 The attributable proportions of cases across different cancer sites varied widely, with the  
11 highest estimates observed for adenocarcinomas of the esophagus and endometrial cancers  
12 ranging from 24.4%-31.8% and 19.6%-34.1% across age groups respectively. Table 4 presents  
13 the numbers and proportion of incident cancer cases attributable to overweight and obesity by  
14 age and sex groups in Alberta in 2012. Measures of uncertainty (95% CIs) for the site-specific  
15 population attributable risk estimates are in Supplementary Table 2. The lowest estimates of  
16 attributable proportions of cancer were observed for breast and pancreatic cancers ranging from  
17 6.2%-9.1% and 4.2-7.4% across age groups, respectively. When examining the absolute number  
18 of cases, the sites most impacted by excess body weight were colorectum for men and women  
19 and breast among women. This higher number is a result of the greater total incidence of these  
20 cancers in the province despite a smaller population attributable risk, which is demonstrated in  
21 Figure 1.  
22  
23  
24  
25  
26  
27  
28  
29  
30  
31  
32  
33  
34  
35  
36  
37

#### 38 *Overall population attributable risk results*

39

40 The overall population attributable risks and number of excess attributable cases of each  
41 cancer type and for all associated and total cancers are presented in Table 5. Examining the  
42 impact on those cancer sites associated with excess body weight, 13.3% of these cancers can be  
43 attributed to overweight and obesity. This number equals 4.3% (n=673) of all cancer cases in  
44 Alberta in 2012. Table 5 presents the age- and sex-specific proportions of cancers attributable to  
45 excess body weight in Alberta in 2012. When prevalence estimates were adjusted to account for  
46  
47  
48  
49  
50  
51  
52  
53  
54  
55  
56  
57  
58  
59  
60

1  
2  
3 self-reported bias, the proportion of incident cancers in 2012 attributable to overweight/obesity  
4  
5 increased to 5.0% (798 excess cases) (Supplementary Table 3).  
6  
7  
8  
9

## 10 **DISCUSSION**

11  
12 We have estimated that at least 4.3% of all cases of adult cancers in 2012 in Alberta were  
13  
14 attributable to excess body weight. These estimates also suggest that the burden of cancer  
15  
16 incidence attributable to these risk factors is greater among women in Alberta, with larger  
17  
18 absolute and relative numbers of cases among women attributable to both overweight and  
19  
20 obesity.  
21  
22  
23

24  
25 Our site-specific estimates are comparable to previous estimates in Canada. The analysis  
26  
27 by Brenner (2014) estimated that 26.6% of endometrial, 7.5% of breast, 9.8% of colon, 15.6% of  
28  
29 esophageal, 19.0% of kidney, 14.2% of gallbladder and 9.2% pancreatic cancers in Canadians in  
30  
31 2007 could be attributed to overweight/obesity.[6] An analysis by Luo et al (2007) estimated that  
32  
33 22.1% of endometrial, 12.1% of breast and 9.5% of colon cancers in adults age 20 and older  
34  
35 could be attributed to obesity in Canada. The authors used six national population-based health  
36  
37 surveys conducted between 1970 and 2004, including the 2004 Canadian Community Health  
38  
39 Survey to obtain data on body mass index. The surveys covered the 10 Canadian provinces.  
40  
41 These estimate are similar to the 26.4%, 7.5% and 9.8%, for these same cancer sites, that we  
42  
43 found in our analyses. Neutel and Morrison (2010) used data on women between the ages of 50  
44  
45 and 69 between the years 1994-2006 from the National Population Health Survey in Canada for  
46  
47 body mass index estimates. They estimated that 8.8% of breast cancers in 2006 could be  
48  
49 attributed to obesity [15]. When examining overall attributable burden, our analyses are directly  
50  
51  
52  
53  
54  
55  
56  
57  
58  
59  
60

1  
2  
3 comparable to the work of Parkin (2011) who estimated that, in the UK for 2010, 5.5% of all  
4  
5 cancers were attributed to excess body weight.[5]  
6  
7  
8  
9

### 10 *Limitations*

11  
12 Our analyses are limited by the use of self-reported data for exposure prevalence  
13  
14 estimates. Validations of Canadian data have shown self-reported measures to underestimate the  
15  
16 prevalence of obesity by 4-7%. [16] When we used adjusted prevalence estimates for overweight  
17  
18 and obesity, the proportion of incident cancers attributable to overweight/obesity increased from  
19  
20 4.3% to 5.0%. These analyses may also be limited since cancer sites for which the evidence of an  
21  
22 etiologic role of obesity is only suggestive were excluded. The cancers not considered were:  
23  
24 cancers of the thyroid [17], ovary [18], malignant melanoma (men only) [19], leukemia, non-  
25  
26 Hodgkin lymphoma and multiple myeloma.[20] Hence, the burden of overweight and obesity on  
27  
28 cancers in Alberta and the actual number of attributable cases was likely underestimated.  
29  
30  
31  
32  
33

34 In separate analyses [21] we have estimated the burden of cancer attributable to physical  
35  
36 inactivity. Since these two risk factors are highly related (i.e. a lack of physical activity leads to  
37  
38 obesity when caloric intake surpasses the needs of the basal metabolic rate), it is likely that there  
39  
40 is overlap in the estimated numbers of the attributable cases. Furthermore, as has been discussed  
41  
42 in thoughtful commentaries and editorials [22], the use of the population attributable risk has  
43  
44 limitations and combining population attributable risks is discouraged.[23]  
45  
46  
47

48 One of the strengths of this investigation is the use of provincially representative  
49  
50 prevalence estimates. Although the Canadian Community Health Survey has limitations, since it  
51  
52 does not capture some specific populations such as aboriginal Canadians or those living on  
53  
54  
55  
56  
57  
58  
59  
60

1  
2  
3 crown land or military facilities, their sampling frames represent over 96-98% of the Canadian  
4 adult population.  
5  
6

7  
8 To quantify the precision of our population attributable risk estimates, we used 95% confidence  
9 intervals. Although including measures of uncertainty was a strength of our study, these 95% confidence  
10 intervals also highlight the lack of precision around our population attributable risk estimates  
11 (Supplementary table 2). For example, in men aged 56-64, we estimate that 5.8% of pancreatic cancer  
12 could be attributable to overweight and obesity, but the 95% confidence interval for the population  
13 attributable risk estimate ranges from 0-14.4%. As such, the lack of precision of our population  
14 attributable risk estimates is a limitation of this analysis and should be considered when interpreting the  
15 proportion of cancers in Alberta attributable to overweight and obesity.  
16  
17  
18  
19  
20  
21  
22  
23  
24  
25  
26  
27

### 28 *Conclusion*

29  
30 Although the estimates presented should be interpreted with caution, since they rely on  
31 several modeling assumptions and self-reported data, it is evident that many thousands of  
32 incident cases of cancer annually can be attributed to excess body weight among Canadians.  
33  
34 With the alarmingly high rates of obesity among adult Albertans, additional targeted prevention  
35 strategies aimed to promote weight loss and maintenance of a healthy body weight are  
36 recommended. These measures are likely to reduce cancer incidence and subsequent mortality at  
37 the population level in Canada.  
38  
39  
40  
41  
42  
43  
44  
45  
46  
47  
48  
49  
50  
51  
52  
53  
54  
55  
56  
57  
58  
59  
60

1  
2  
3  
4  
5  
6  
7  
8  
9  
10  
11  
12  
13  
14  
15  
16  
17  
18  
19  
20  
21  
22  
23  
24  
25  
26  
27  
28  
29  
30  
31  
32  
33  
34  
35  
36  
37  
38  
39  
40  
41  
42  
43  
44  
45  
46  
47  
48  
49  
50  
51  
52  
53  
54  
55  
56  
57  
58  
59  
60

**ACKNOWLEDGEMENTS**

This project was funded by the Alberta Cancer Prevention Legacy Fund. Dr Christine Friedenreich is supported by an Alberta Innovates-Health Solutions Health Senior Scholar Award and the Alberta Cancer Foundation Weekend to End Women’s Cancers Breast Cancer Chair at the University of Calgary. Dr. Darren Brenner is supported by a Career Development Award in Prevention from the Canadian Cancer Society Research Institute. We gratefully acknowledge Dr. Laura McDougall from the Alberta Cancer Prevention Legacy Fund for her support and guidance. We also thank Bethany Kaposhi and Lorraine Shack from the Alberta Cancer Registry for providing cancer incidence data, the department of Data Integration, Measurement and Reporting at Alberta Health Services for access to CCHS data.

Confidential

## References

1. Grundy A, Frierenreich CM, Poirier AE, Brenner DR. The number of cancers attributable to lifestyle and environment in Alberta, Canada: methods and series overview. *CMAJ Open*. 2016; Under review.
2. International Agency for Research on Cancer (IARC) WHO. *IARC Handbooks of Cancer Prevention: Weight Control and Physical Activity* Vol. 6. Lyon, France: International Agency for Research on Cancer; 2002.
3. World Cancer Research Fund/American Institute for Cancer Research. *Food, Nutrition, Physical Activity and the Prevention of Cancer: a Global Perspective*. Washington DC: AICR, 2007.
4. Renehan AG, Roberts DL, Dive C. Obesity and cancer: pathophysiological and biological mechanisms. *Arch Physiol Biochem*. 2008;114(1):71-83.
5. Parkin DM, Boyd L. 8. Cancers attributable to overweight and obesity in the UK in 2010. *Br J Cancer*. 2011;105 Suppl 2:S34-7.
6. Brenner DR. Cancer incidence due to excess body weight and leisure-time physical inactivity in Canada: Implications for prevention. *Preventive Medicine*. 2014;66(0):131-9.
7. Health Canada. *Canadian Guidelines for Body Weight Classification in Adults*. Ottawa: 2003.
8. Beland Y. Canadian community health survey--methodological overview. *Health Rep*. 2002;13(3):9-14.
9. Renehan AG, Tyson M, Egger M, Heller RF, Zwahlen M. Body-mass index and incidence of cancer: a systematic review and meta-analysis of prospective observational studies. *Lancet*. 2008;371(9612):569-78.
10. Renehan AG, Soerjomataram I, Tyson M, Egger M, Zwahlen M, Coebergh JW, et al. Incident cancer burden attributable to excess body mass index in 30 European countries. *International journal of cancer Journal international du cancer*. 2010;126(3):692-702.
11. Lee IM, Shiroma EJ, Lobelo F, Puska P, Blair SN, Katzmarzyk PT. Effect of physical inactivity on major non-communicable diseases worldwide: an analysis of burden of disease and life expectancy. *The Lancet*. 2012;380(9838):219-29.
12. Gold EB, Bromberger J, Crawford S, Samuels S, Greendale GA, Harlow SD, et al. Factors associated with age at natural menopause in a multiethnic sample of midlife women. *Am J Epidemiol*. 2001;153(9):865-74.
13. Palacios S, Henderson VW, Siseles N, Tan D, Villaseca P. Age of menopause and impact of climacteric symptoms by geographical region. *Climacteric*. 2010;13(5):419-28.
14. Shields M, Gorber SC, Janssen I, Tremblay MS. Bias in self-reported estimates of obesity in Canadian health surveys: an update on correction equations for adults. *Health reports / Statistics Canada, Canadian Centre for Health Information = Rapports sur la santé / Statistique Canada, Centre canadien d'information sur la santé*. 2011;22(3):35-45.
15. Neutel CI, Morrison H. Could recent decreases in breast cancer incidence really be due to lower HRT use? Trends in attributable risk for modifiable breast cancer risk factors in Canadian women. *Canadian journal of public health = Revue canadienne de sante publique*. 2010;101(5):405-9.
16. Public Health Agency of Canada. *Obesity in Canada. A joint report report from the Public Health Agency of Canada and the Canadian Institute for Health Information*. Ottawa, Ontario: 2011.
17. Harari A, Endo B, Nishimoto S, Ituarte PH, Yeh MW. Risk of advanced papillary thyroid cancer in obese patients. *Arch Surg*. 2012;147(9):805-11.
18. Lahmann PH, Cust AE, Friedenreich CM, Schulz M, Lukanova A, Kaaks R, et al. Anthropometric measures and epithelial ovarian cancer risk in the European Prospective Investigation into Cancer and Nutrition. *Int J Cancer*. 2010;126(10):2404-15.
19. Samanic C, Gridley G, Chow WH, Lubin J, Hoover RN, Fraumeni JF, Jr. Obesity and cancer risk among white and black United States veterans. *Cancer Causes Control*. 2004;15(1):35-43.

- 1
  - 2
  - 3
  - 4
  - 5
  - 6
  - 7
  - 8
  - 9
  - 10
  - 11
  - 12
  - 13
  - 14
  - 15
  - 16
  - 17
  - 18
  - 19
  - 20
  - 21
  - 22
  - 23
  - 24
  - 25
  - 26
  - 27
  - 28
  - 29
  - 30
  - 31
  - 32
  - 33
  - 34
  - 35
  - 36
  - 37
  - 38
  - 39
  - 40
  - 41
  - 42
  - 43
  - 44
  - 45
  - 46
  - 47
  - 48
  - 49
  - 50
  - 51
  - 52
  - 53
  - 54
  - 55
  - 56
  - 57
  - 58
  - 59
  - 60
20. Engeland A, Tretli S, Hansen S, Bjorge T. Height and body mass index and risk of lymphohematopoietic malignancies in two million Norwegian men and women. *Am J Epidemiol.* 2007;165(1):44-52.
21. Brenner DR, Grevers X, Grundy A, Poirier AE, Khandwala F, McFadden A, et al. Cancer incidence attributable to inadequate physical activity in Alberta, Canada in 2012. *CMAJ Open.* 2016;Under review.
22. Rockhill B, Newman B, Weinberg C. Use and misuse of population attributable fractions. *Am J Public Health.* 1998;88(1):15-9.
23. Morgenstern H. Attributable Fractions. In: Boslaugh S, editor. *Encyclopedia of Epidemiology.* 1. Thousand Oaks, CA: Sage Publications; 2008.

Confidential



**Table 1.** Predetermined latency periods by cancer site and cycle of prevalence data used for population attributable risk calculations

| <b>Exposure</b>        | <b>Cancer site</b> | <b>Latency period</b> | <b>Corresponding CCHS cycle (year)</b> |
|------------------------|--------------------|-----------------------|----------------------------------------|
| Overweight and Obesity | Esophagus          | 11-12 years           | 1.1 (2000/2001)                        |
|                        | Pancreas           | 9 years               | 2.1 (2003)                             |
|                        | Colorectum         | 9 years               | 2.1 (2003)                             |
|                        | Kidney             | 11-12 years           | 1.1 (2000/2001)                        |
|                        | Gallbladder        | 11-12 years           | 1.1 (2000/2001)                        |
|                        | Breast             | 9 years               | 2.1 (2000/2001)                        |
|                        | Endometrium        | 11-12 years           | 1.1 (2000/2001)                        |

Abbreviations: CCHS = Canadian Community Health Survey

Confidential

**Table 2.** Risk estimates<sup>a</sup> for risk associated with overweight/obesity by cancer sites of interest

| Cancer site  | Sex   | Relative Risk (95% CI) <sup>b</sup> |
|--------------|-------|-------------------------------------|
| Esophagus    | Men   | 1.52 (1.33, 1.74)                   |
|              | Women | 1.51 (1.31, 1.74)                   |
| Pancreas     | Men   | 1.07 (0.93, 1.23)                   |
|              | Women | 1.12 (1.02, 1.22)                   |
| Colon-rectum | Men   | 1.24 (1.20, 1.28)                   |
|              | Women | 1.09 (1.05, 1.13)                   |
| Kidney       | Men   | 1.24 (1.15, 1.34)                   |
|              | Women | 1.34 (1.25, 1.43)                   |
| Gallbladder  | Men   | 1.09 (0.99, 1.21)                   |
|              | Women | 1.59 (1.02, 2.47)                   |
| Breast       | Women | 1.12 (1.08, 1.16)                   |
| Endometrium  | Women | 1.59 (1.50, 1.68)                   |

<sup>a</sup>Risk estimates from Renehan et al., 2008 [9]

<sup>b</sup>Risk estimates are for an increase in body mass index of 5 kg/m<sup>2</sup>

**Table 3.** Prevalence of overweight and obese adults in Alberta, 2000-2001

| Age (years) | Prevalence (95% CI)                        |                                       |
|-------------|--------------------------------------------|---------------------------------------|
|             | Overweight ( $\geq 25$ kg/m <sup>2</sup> ) | Obese ( $\geq 30$ kg/m <sup>2</sup> ) |
| Men         |                                            |                                       |
| 18-34       | 33.7 (30.8,36.7)                           | 13.8 (11.8,15.8)                      |
| 35-44       | 41.9 (38.2,45.7)                           | 19.0 (15.9,22.2)                      |
| 45-54       | 43.2 (39.1,47.3)                           | 19.4 (16.1,22.7)                      |
| 65-74       | 47.2 (41.9,52.6)                           | 17.2 (13.5,20.9)                      |
| $\geq 75$   | 38.2 (32.4,44.0)                           | 17.7 (13.9,21.5)                      |
| Women       |                                            |                                       |
| 18-34       | 17.2 (14.8,19.6)                           | 9.3 (7.7,10.9)                        |
| 35-44       | 26.6 (23.4,29.8)                           | 14.7 (12.1,17.2)                      |
| 45-54       | 27.7 (23.9,31.4)                           | 17.5 (14.3,20.8)                      |
| 65-74       | 35.2 (29.8,40.6)                           | 20.2 (15.8,24.6)                      |
| $\geq 75$   | 35.1 (29.8,40.3)                           | 17.3 (13.6,21.0)                      |
| Total       |                                            |                                       |
| 18-34       | 25.9 (24.0,27.7)                           | 11.7 (10.4,12.9)                      |
| 35-44       | 34.4 (31.9,36.8)                           | 16.9 (14.9,18.9)                      |
| 45-54       | 35.7 (32.9,38.5)                           | 18.5 (16.1,20.9)                      |
| 65-74       | 41.1 (37.3,44.9)                           | 18.7 (15.9,21.5)                      |
| $\geq 75$   | 36.6 (32.5,40.7)                           | 17.5 (14.7,20.3)                      |

\*Data from the Canadian Community Health Survey Cycle 1.1 (2000/2001)

**Table 4.** Adult cancer cases and proportions attributable to overweight and obesity in Alberta (2012)

| Age at Exposure | Age at Outcome | Esophagus <sup>a</sup> |      |     | Pancreas |     |     | Colorectum |      |     | Kidney |      |     | Gallbladder |      |      | Breast |     |     | Endometrium |      |     |
|-----------------|----------------|------------------------|------|-----|----------|-----|-----|------------|------|-----|--------|------|-----|-------------|------|------|--------|-----|-----|-------------|------|-----|
|                 |                | Obs.                   | PAR  | EAC | Obs.     | PAR | EAC | Obs.       | PAR  | EAC | Obs.   | PAR  | EAC | Obs.        | PAR  | EAC  | Obs.   | PAR | EAC | Obs.        | PAR  | EAC |
| <b>Men</b>      |                |                        |      |     |          |     |     |            |      |     |        |      |     |             |      |      |        |     |     |             |      |     |
| 18-34           | 28-44          | <5                     | 26.3 | <5  | 5        | 4.2 | 0   | 39         | 13.4 | 5   | 28     | 13.4 | 4   | -           | -    | -    |        |     |     |             |      |     |
| 35-44           | 45-54          | 20                     | 31.8 | 6   | 19       | 5.4 | 1   | 125        | 16.8 | 21  | 56     | 16.9 | 9   | <5          | 6.8  | <5   |        |     |     |             |      |     |
| 45-54           | 55-64          | 38                     | 32.4 | 12  | 33       | 5.8 | 2   | 301        | 18.1 | 54  | 109    | 17.2 | 19  | <5          | 7    | <5   |        |     |     |             |      |     |
| 55-64           | 65-74          | 25                     | 32   | 8   | 50       | 5.6 | 3   | 304        | 17.6 | 54  | 79     | 17.1 | 13  | 6           | 7    | <5   |        |     |     |             |      |     |
| 65-74           | 75-84          | 17                     | 30.1 | 5   | 48       | 5.6 | 3   | 264        | 17.3 | 46  | 48     | 15.7 | 8   | 12          | 6.3  | 1    |        |     |     |             |      |     |
| ≥ 75            | ≥ 85           | 6                      | 27.9 | 2   | 17       | 4.6 | 1   | 74         | 14.4 | 11  | 6      | 14.5 | 1   | <5          | 5.8  | <5   |        |     |     |             |      |     |
| Total           |                | <111                   |      | <38 | 172      |     | 9   | 1107       |      | 191 | 326    |      | 54  | 24          |      | 2    |        |     |     |             |      |     |
| <b>Women</b>    |                |                        |      |     |          |     |     |            |      |     |        |      |     |             |      |      |        |     |     |             |      |     |
| 18-34           | 28-44          | <5                     | 17.1 | <5  | <5       | 4.5 | 0   | 37         | 3.4  | 1   | 14     | 11.7 | 2   | <5          | 19.6 | <5   |        |     |     | 26          | 19.6 | 5   |
| 35-44           | 45-54          | <5                     | 24.5 | <5  | 26       | 5.8 | 1   | 108        | 4.4  | 5   | 28     | 17.2 | 5   | <5          | 27.6 | <5   |        |     |     | 83          | 27.6 | 23  |
| 45-54           | 55-64          | 6                      | 26.8 | 2   | 42       | 7.1 | 3   | 179        | 5.4  | 10  | 41     | 18.9 | 8   | 7           | 30.1 | 2    | 577    | 7.1 | 41  | 195         | 30.1 | 59  |
| 55-64           | 65-74          | <5                     | 30.5 | <5  | 54       | 9.1 | 5   | 198        | 6.9  | 14  | 40     | 21.9 | 9   | 9           | 34.1 | 3    | 541    | 9.1 | 49  | 127         | 34.1 | 43  |
| 65-74           | 75-84          | -                      | -    | -   | 60       | 8.4 | 5   | 214        | 6.4  | 14  | 22     | 20.4 | 4   | 8           | 32   | 3    | 321    | 8.4 | 27  | 55          | 32   | 18  |
| ≥ 75            | ≥ 85           | -                      | -    | -   | 25       | 6.2 | 2   | 112        | 4.7  | 5   | 11     | 17.2 | 2   | <5          | 27.6 | <5   | 106    | 6.2 | 7   | 18          | 27.6 | 5   |
| Total           |                | <15                    |      | <5  | <21      |     | 16  | 848        |      | 48  | 156    |      | 29  | 31          | 10   | 1545 |        | 124 | 504 |             | 153  |     |
| <b>Total</b>    |                |                        |      |     |          |     |     |            |      |     |        |      |     |             |      |      |        |     |     |             |      |     |
| 18-34           | 28-44          | 5                      | 24.4 | 1   | <10      | 4.2 | 0   | 76         | 8.5  | 6   | 42     | 12.8 | 5   | <5          | 19.6 | <5   |        |     |     | 26          | 19.6 | 5   |
| 35-44           | 45-54          | <25                    | 30.6 | <10 | 45       | 5.6 | 3   | 233        | 11.1 | 26  | 84     | 17   | 14  | <10         | 20.7 | <5   |        |     |     | 83          | 27.6 | 23  |
| 45-54           | 55-64          | 44                     | 31.3 | 14  | 75       | 6.6 | 5   | 480        | 13.4 | 64  | 150    | 17.7 | 27  | <12         | 25   | 2    | 577    | 7.1 | 41  | 195         | 30.1 | 59  |
| 55-64           | 65-74          | <30                    | 31.8 | <10 | 104      | 7.4 | 8   | 502        | 13.4 | 67  | 119    | 18.7 | 22  | 15          | 23.2 | 3    | 541    | 9.1 | 49  | 127         | 34.1 | 43  |
| 65-74           | 75-84          | 17                     | 29.9 | 5   | 108      | 7.1 | 8   | 478        | 12.4 | 59  | 70     | 17.2 | 12  | 20          | 16.6 | 3    | 321    | 8.4 | 27  | 55          | 32   | 18  |
| ≥ 75            | ≥ 85           | 6                      | 27   | 2   | 42       | 5.6 | 2   | 186        | 8.6  | 16  | 17     | 16.2 | 3   | <5          | 16.7 | <5   | 106    | 6.2 | 7   | 18          | 27.6 | 5   |
| Total           |                | 123                    |      | 38  | <38      |     | 25  | 1955       |      | 239 | 482    |      | 83  | 55          | 11   | 1545 |        | 124 | 504 |             | 153  |     |

Abbreviations: EAC. = Excess attributable cases due to exposure, Obs. = Total number of observed cases per age-sex group, PAR = Population Attributable Risk  
 \*Cell counts of less than 5 for observed cases were suppressed to comply with confidentiality requirements

**Table 5.** Summary of cases and proportions of cancer in Alberta adults in 2012 attributable to overweight/obesity<sup>a</sup>

| Cancer Site <sup>b</sup>                  | Total          |                           |                | Men            |                           |                | Women          |                           |                |
|-------------------------------------------|----------------|---------------------------|----------------|----------------|---------------------------|----------------|----------------|---------------------------|----------------|
|                                           | Observed Cases | Excess Attributable Cases | % Attributable | Observed Cases | Excess Attributable Cases | % Attributable | Observed Cases | Excess Attributable Cases | % Attributable |
| Esophagus <sup>f</sup>                    | 123            | 38                        | 30.9           | 110            | 35                        | 31.4           | 13             | 3                         | 26.8           |
| Pancreas                                  | 380            | 25                        | 6.7            | 172            | 9                         | 5.5            | 208            | 16                        | 7.7            |
| Colorectum                                | 1955           | 239                       | 12.2           | 1107           | 191                       | 17.2           | 848            | 48                        | 5.7            |
| Kidney                                    | 482            | 83                        | 17.3           | 326            | 54                        | 16.5           | 156            | 29                        | 18.8           |
| Breast <sup>g</sup>                       | 1545           | 124                       | 8.0            |                |                           |                | 1545           | 124                       | 8.0            |
| Endometrium                               | 504            | 153                       | 30.3           |                |                           |                | 504            | 153                       | 30.3           |
| Gall Bladder                              | 55             | 11                        | 20.3           | 24             | 2                         | 6.5            | 31             | 10                        | 30.9           |
| <b>All Associated Cancers<sup>h</sup></b> | 5044           | 673                       | 13.3           | 1739           | 290                       | 16.7           | 3305           | 383                       | 11.6           |
| <b>All Cancers<sup>i</sup></b>            | 15836          | 673                       | 4.3            | 8155           | 290                       | 3.6            | 7681           | 383                       | 5.0            |

<sup>a</sup> Overweight and obesity measured using body mass index measures from the Canadian Community Health Survey.

<sup>b</sup> Cancer incidence data for the year 2012 from the Alberta Cancer Registry.

<sup>c</sup> Number of observed cancer cases in Alberta in 2012 at individual cancer sites.

<sup>d</sup> Number of cancer cases at individual cancer sites that can be attributed to overweight/obesity.

<sup>e</sup> Proportion of cancers at individual cancer sites attributable to overweight/obesity.

<sup>f</sup> Adenocarcinomas only.

<sup>g</sup> Postmenopausal breast cancer only. Defined as cancers diagnosed at age 55 or older.

<sup>h</sup> Represents all cancers with a known association with overweight/obesity, as listed in table.

<sup>i</sup> Represents all incident cancers in Alberta in 2012 in all age groups.

1  
2  
3  
4  
5  
6  
7  
8  
9  
10  
11  
12  
13  
14  
15  
16  
17  
18  
19  
20  
21  
22  
23  
24  
25  
26  
27  
28  
29  
30  
31  
32  
33  
34  
35  
36  
37  
38  
39  
40  
41  
42  
43  
44  
45  
46  
47  
48  
49  
50  
51  
52  
53  
54  
55  
56  
57  
58  
59  
60

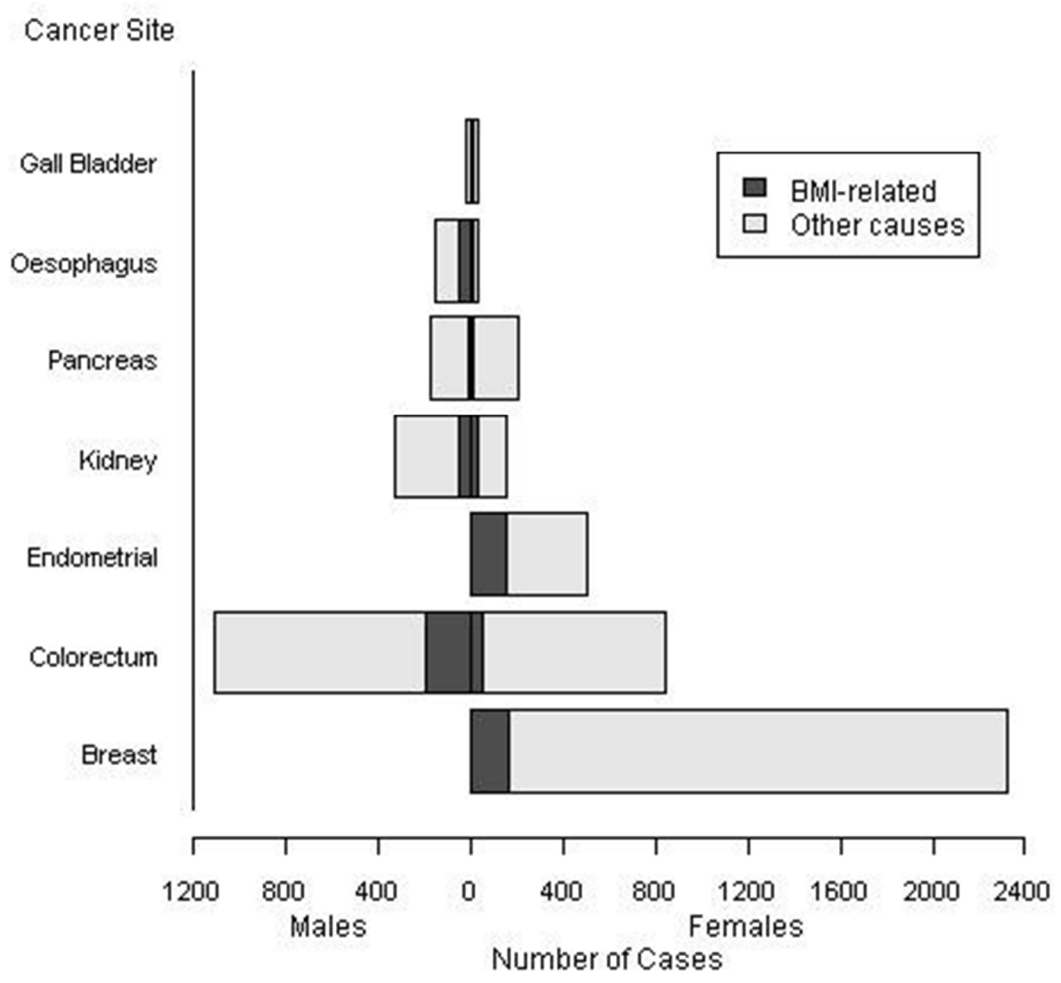

Figure 1 Cancer cases attributable to overweight or obesity and other causes

**Supplementary Table 1.** Prevalence of overweight and obese adults in Alberta used in sensitivity analyses of self-reported CCHS estimates

| Age (years)  | Prevalence |       |
|--------------|------------|-------|
|              | Overweight | Obese |
| <b>Men</b>   |            |       |
| 18-34        | 35.6       | 20.2  |
| 35-44        | 43.8       | 25.4  |
| 45-54        | 45.1       | 25.8  |
| 65-74        | 49.1       | 23.6  |
| ≥ 75         | 40.1       | 24.1  |
| <b>Women</b> |            |       |
| 18-34        | 21.1       | 16    |
| 35-44        | 30.5       | 21.4  |
| 45-54        | 31.6       | 24.2  |
| 65-74        | 39.1       | 26.9  |
| ≥ 75         | 39         | 24    |

\*Self-reported estimates from 2000 Canadian Community Health Survey (CCHS) adjusted for reporting bias based on validation study by Shields et al. [14] where overweight prevalence was underestimated by 1.9% among males and 3.9% among females while obese was underestimated by 6.4% among males and 6.7% among females when applying measured body mass index from 2008 Canadian Health Measures Survey (CHMS) to the 2005 CCHS self-reported estimates.

**Supplementary Table 2.** Cancer cases and proportions in 2012 attributable to overweight or obesity in Alberta by age and sex

| Age Group at Exposure | Age Group at Outcome | Cancer Site        | Total Obs. Cases | Total PAR (%) | Obs. Cases Men | Men PAR (%) (95% CI) | Obs. Cases Women | Women PAR (%) (95% CI) |
|-----------------------|----------------------|--------------------|------------------|---------------|----------------|----------------------|------------------|------------------------|
| 18-34                 | 28 - 44              | Esophagus          | 5                | 24.4          | <5             | 26.3                 | <5               | 17.1 (12.4,22.6)       |
|                       |                      | Pancreas           | <10              | 4.2           | 5              | 4.2 (0,10.4)         | <5               | 4.5 (1.9,7.4)          |
|                       |                      | Colon-rectum       | 76               | 8.5           | 39             | 13.4                 | 37               | 3.4 (2.3,4.6)          |
|                       |                      | Kidney             | 42               | 12.8          | 28             | 13.4                 | 14               | 11.7 (9.3,14.3)        |
|                       |                      | Gallbladder        | <5               | 19.6          | -              | -                    | <5               | 19.6 (5.8,37.9)        |
|                       |                      | Breast Endometrium | 26               | 19.6          |                |                      | 26               | 19.6 (17.0,22.4)       |
| 35-44                 | 45 - 54              | Esophagus          | <25              | 31.2          | 20             | 31.8                 | <5               | 24.5 (18.1,31.4)       |
|                       |                      | Pancreas           | 45               | 5.6           | 19             | 5.4 (0,13.5)         | 26               | 5.8 (2.5,9.5)          |
|                       |                      | Colon-rectum       | 233              | 11.1          | 125            | 16.8                 | 108              | 4.4 (2.9,5.9)          |
|                       |                      | Kidney             | 84               | 17            | 56             | 16.9                 | 28               | 17.2 (13.9,20.7)       |
|                       |                      | Gallbladder        | <5               | 20.7          | <5             | 6.8 (1.2,12.5)       | <5               | 27.6 (9.7,48.6)        |
|                       |                      | Breast Endometrium | 83               | 27.6          |                |                      | 83               | 27.6 (24.3,31.1)       |
| 45-54                 | 55 - 64              | Esophagus          | 44               | 31.6          | 38             | 32.4                 | 6                | 26.8 (19.8,34.3)       |
|                       |                      | Pancreas           | 75               | 6.6           | 33             | 5.8 (0,14.4)         | 42               | 7.1 (3.1,11.5)         |
|                       |                      | Colon-rectum       | 480              | 13.4          | 301            | 18.1                 | 179              | 5.4 (3.6,7.3)          |
|                       |                      | Kidney             | 150              | 17.7          | 109            | 17.2                 | 41               | 18.9 (15.3,22.8)       |
|                       |                      | Gallbladder        | <12              | 25            | <5             | 7.0 (1.3,12.9)       | 7                | 30.1 (9.7,52.7)        |
|                       |                      | Breast Endometrium | 577              | 7.1           |                |                      | 577              | 7.1 (5.3,9.0)          |
|                       |                      | 195                | 30.1             |               |                | 195                  | 30.1 (26.4,34.0) |                        |
| 55-64                 | 65 - 74              | Esophagus          | 29               | 31.8          | 25             | 32.0                 | 4                | 30.5 (22.7,38.6)       |
|                       |                      | Pancreas           | 104              | 7.4           | 50             | 5.6 (0,13.9)         | 54               | 9.1 (3.9,14.5)         |
|                       |                      | Colon-rectum       | 502              | 13.4          | 304            | 17.6                 | 198              | 6.9 (4.7,9.4)          |
|                       |                      | Kidney             | 119              | 18.7          | 79             | 17.1                 | 40               | 21.9 (17.7,26.4)       |
|                       |                      | Gallbladder        | 15               | 23.2          | 6              | 7.0 (1.3,12.7)       | 9                | 34.1 (11.5,56.8)       |
|                       |                      | Breast Endometrium | 541              | 9.1           |                |                      | 541              | 9.1 (6.9,11.5)         |
|                       |                      | 127                | 34.1             |               |                | 127                  | 34.1 (29.7,38.4) |                        |
| 65-74                 | 75 - 84              | Esophagus          | 17               | 30.1          | 17             | 30.1                 | -                | -                      |
|                       |                      | Pancreas           | 108              | 7.1           | 48             | 5.6 (0,13.8)         | 60               | 8.4 (3.7,13.3)         |
|                       |                      | Colon-rectum       | 478              | 12.4          | 264            | 17.3                 | 214              | 6.4 (4.3,8.5)          |
|                       |                      | Kidney             | 70               | 17.2          | 48             | 15.7                 | 22               | 20.4 (16.6,24.5)       |
|                       |                      | Gallbladder        | 20               | 16.6          | 12             | 6.3 (1.3,11.8)       | 8                | 32.0 (11.8,53.9)       |
|                       |                      | Breast Endometrium | 321              | 8.4           |                |                      | 321              | 8.4 (6.3,10.6)         |
|                       |                      | 55                 | 32.0             |               |                | 55                   | 32.0 (28.0,36.2) |                        |
| ≥ 75                  | ≥ 85                 | Esophagus          | 6                | 27.9          | 6              | 27.9                 | -                | -                      |
|                       |                      | Pancreas           | 42               | 5.6           | 17             | 4.6 (0,11.5)         | 25               | 6.2 (2.6,10.1)         |
|                       |                      | Colon-rectum       | 186              | 8.6           | 74             | 14.4                 | 112              | 4.7 (3.2,6.4)          |
|                       |                      | Kidney             | 17               | 16.2          | 6              | 14.5                 | 11               | 17.2 (13.8,21.0)       |
|                       |                      | Gallbladder        | <5               | 16.7          | <5             | 5.8 (1.0,11.1)       | <5               | 27.6 (9.5,48.4)        |
|                       |                      | Breast Endometrium | 106              | 6.2           |                |                      | 106              | 6.2 (4.5,8.1)          |
|                       |                      | 18                 | 27.6             |               |                | 18                   | 27.6 (23.7,31.6) |                        |

Abbreviations: Obs. = Total number of observed cases per age-sex group, PAR = Population attributable risk

\*Cell counts of less than 5 for observed cases were suppressed to comply with confidentiality requirements



**Supplementary Table 3.** Cancer cases and proportions attributable to overweight and obesity in Alberta (2012) using prevalence estimates adjusted for bias

| Age at Exposure (years) | Age at Outcome (years) | Esophagus <sup>a</sup> |      |     | Pancreas |      |     | Colorectum |      |     | Kidney |      |     | Gallbladder |      |     | Breast |      |      | Endometrium |      |     |
|-------------------------|------------------------|------------------------|------|-----|----------|------|-----|------------|------|-----|--------|------|-----|-------------|------|-----|--------|------|------|-------------|------|-----|
|                         |                        | Obs.                   | PAR  | EAC | Obs.     | PAR  | EAC | Obs.       | PAR  | EAC | Obs.   | PAR  | EAC | Obs.        | PAR  | EAC | Obs.   | PAR  | EAC  | Obs.        | PAR  | EAC |
| <b>Men</b>              |                        |                        |      |     |          |      |     |            |      |     |        |      |     |             |      |     |        |      |      |             |      |     |
| 18-34                   | 28-44                  | <5                     | 31.0 | <5  | 5        | 5.1  | 0   | 39         | 16.2 | 6   | 28     | 16.3 | 5   | 0           | 6.5  | -   |        |      |      |             |      |     |
| 35-44                   | 45-54                  | 20                     | 35.9 | 7   | 19       | 6.3  | 1   | 125        | 19.4 | 24  | 56     | 19.5 | 11  | <5          | 8    | -   |        |      |      |             |      |     |
| 45-54                   | 55-64                  | 38                     | 36.4 | 14  | 33       | 6.8  | 2   | 301        | 20.6 | 62  | 109    | 19.8 | 22  | <5          | 8.2  | -   |        |      |      |             |      |     |
| 55-64                   | 65-74                  | 25                     | 36.1 | 9   | 50       | 6.6  | 3   | 304        | 20.2 | 61  | 79     | 19.7 | 16  | 6           | 8.1  | -   |        |      |      |             |      |     |
| 65-74                   | 75-84                  | 17                     | 34.4 | 6   | 48       | 6.5  | 3   | 264        | 19.9 | 53  | 48     | 18.4 | 9   | 12          | 7.5  | 2   |        |      |      |             |      |     |
| ≥75                     | ≥85                    | 6                      | 32.5 | 2   | 17       | 5.5  | 1   | 74         | 17.2 | 13  | 6      | 17.3 | 1   | 2           | 7    | -   |        |      |      |             |      |     |
| Total                   |                        | <111                   |      | <43 | 172      |      | 11  | 1107       |      | 219 | 326    |      | 62  | <30         |      | 2   |        |      |      |             |      |     |
| <b>Women</b>            |                        |                        |      |     |          |      |     |            |      |     |        |      |     |             |      |     |        |      |      |             |      |     |
| 18-34                   | 28-44                  | <5                     | 23.8 | -   | <5       | 6.5  | 0   | 37         | 4.9  | 2   | 14     | 16.6 | 2   | <5          | 27   | -   | 26     | 27   | 7    |             |      |     |
| 35-44                   | 45-54                  | <5                     | 30   | <5  | 26       | 7.7  | 2   | 108        | 5.8  | 6   | 28     | 21.5 | 6   | <5          | 33.6 | <5  | 83     | 33.6 | 28   |             |      |     |
| 45-54                   | 55-64                  | 6                      | 32   | 2   | 42       | 8.9  | 4   | 179        | 6.8  | 12  | 41     | 23.1 | 9   | 7           | 35.7 | 3   | 195    | 35.7 | 70   | 577         | 8.9  | 52  |
| 55-64                   | 65-74                  | <5                     | 35.2 | <5  | 54       | 10.9 | 6   | 198        | 8.3  | 16  | 40     | 25.8 | 10  | 9           | 39.1 | 4   | 127    | 39.1 | 50   | 541         | 10.9 | 59  |
| 65-74                   | 75-84                  | -                      | -    | -   | 60       | 10.1 | 6   | 214        | 7.8  | 17  | 22     | 24.4 | 5   | 8           | 37.4 | 3   | 55     | 37.4 | 21   | 321         | 10.1 | 33  |
| ≥75                     | ≥85                    | -                      | -    | -   | 25       | 8.1  | 2   | 112        | 6.2  | 7   | 11     | 21.5 | 2   | 2           | 33.6 | 1   | 18     | 33.6 | 6    | 106         | 8.1  | 9   |
| Total                   |                        | <15                    |      | 4   | <212     |      | 20  | 848        |      | 60  | 156    |      | 36  | 31          | <15  | 504 |        | 181  | 1545 |             | 152  |     |
| <b>Total</b>            |                        |                        |      |     |          |      |     |            |      |     |        |      |     |             |      |     |        |      |      |             |      |     |
| 18-34                   | 28-44                  | 5                      | 29.6 | <5  | 6        | 5.4  | 0   | 76         | 10.7 | 8   | 42     | 16.4 | 7   | <5          | 27   | -   | 26     | 27   | 7    |             |      |     |
| 35-44                   | 45-54                  | <25                    | 35.4 | <12 | 45       | 7.1  | 3   | 233        | 13.1 | 31  | 84     | 20.1 | 17  | 6           | 25.1 | 2   | 83     | 33.6 | 28   |             |      |     |
| 45-54                   | 55-64                  | 44                     | 35.8 | 16  | 75       | 8    | 6   | 480        | 15.5 | 74  | 150    | 20.7 | 31  | 9           | 29.6 | 3   | 195    | 35.7 | 70   | 577         | 8.9  | 52  |
| 55-64                   | 65-74                  | <30                    | 36   | <14 | 104      | 8.8  | 9   | 502        | 15.5 | 78  | 119    | 21.7 | 26  | 15          | 26.7 | 4   | 127    | 39.1 | 50   | 541         | 10.9 | 59  |
| 65-74                   | 75-84                  | 17                     | 34.4 | 6   | 108      | 8.5  | 9   | 478        | 14.5 | 69  | 70     | 20.3 | 14  | 20          | 19.5 | 4   | 55     | 37.4 | 21   | 321         | 10.1 | 33  |
| ≥75                     | ≥85                    | 6                      | 27   | 2   | 42       | 5.6  | 2   | 186        | 8.6  | 16  | 17     | 16.2 | 3   | <5          | 16.7 | <5  | 106    | 6.2  | 7    | 18          | 27.6 | 5   |
| Total                   |                        | 123                    |      | <47 | <384     |      | 25  | 1955       |      | 239 | 482    |      | 83  | 55          |      | 11  | 1545   |      | 124  | 504         |      | 153 |

Abbreviations: EAC. = Excess attributable cases due to exposure, Obs. = Total number of observed cases per age-sex group, PAR = Population Attributable Risk

\*Cell counts of less than 5 for observed cases were suppressed to comply with confidentiality requirements. Adjusted prevalence estimates shown in Supplementary Table 1.

For Peer Review Only
